# Supplementary material for: A decade-long cruise time series (2008–2018) of physical and biogeochemical conditions in the southern Salish Sea, North America
Source: Copernicus journal article supplement (doi:10.5194/essd-16-837-2024), 2024-02-08
Supplement: Supplementary file 1 [file essd-16-837-2024-supplement.pdf]

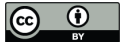

*Supplement of*

**A decade-long cruise time series (2008–2018) of physical and biogeochemical conditions in the southern Salish Sea, North America**

**Simone R. Alin et al.**

*Correspondence to:* Simone R. Alin ([simone.r.alin@noaa.gov](mailto:simone.r.alin@noaa.gov))

The copyright of individual parts of the supplement might differ from the article licence.

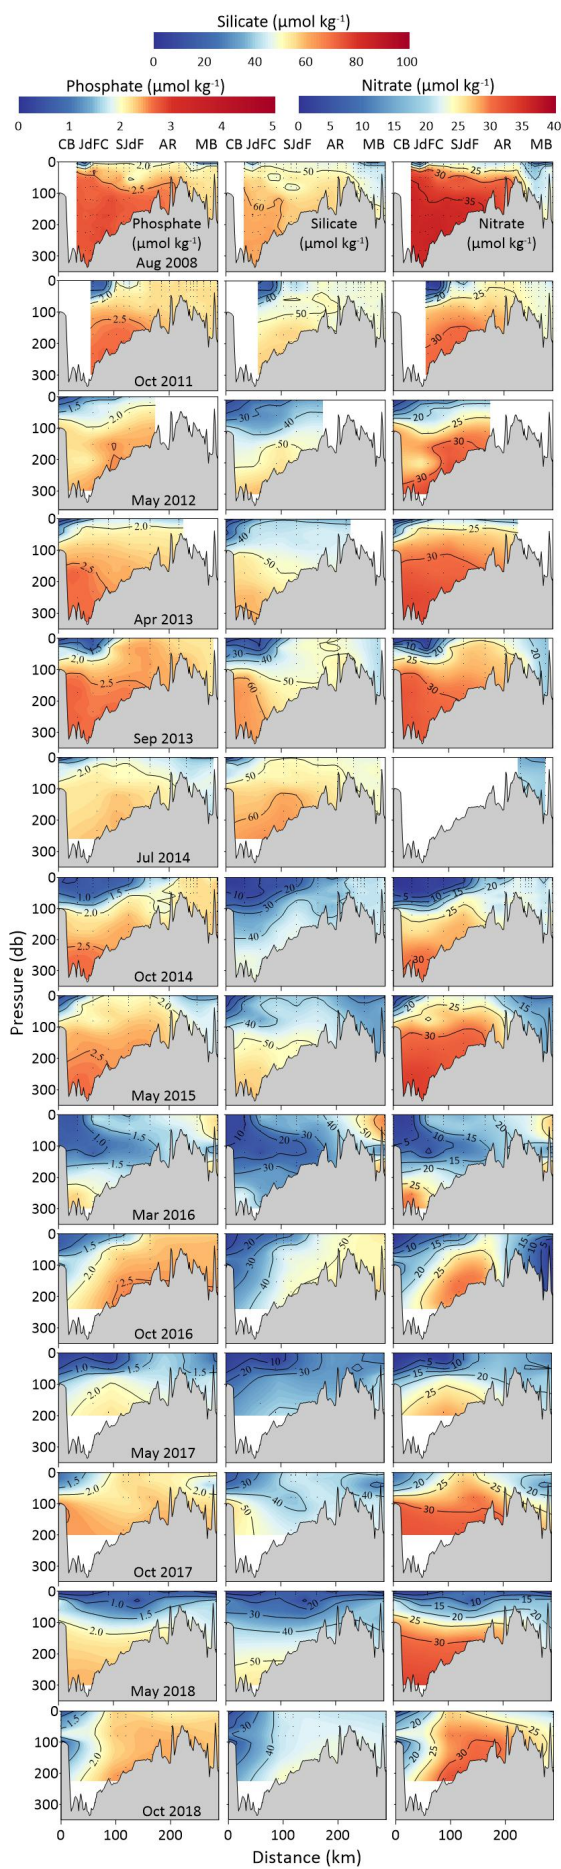

**Figure S1:** Depth transect plots from Sound-to-Sea cruises for phosphate, silicate, and nitrate content ( $\mu\text{mol kg}^{-1}$ ). Figure organization is the same as in Figure 4 in the main text.

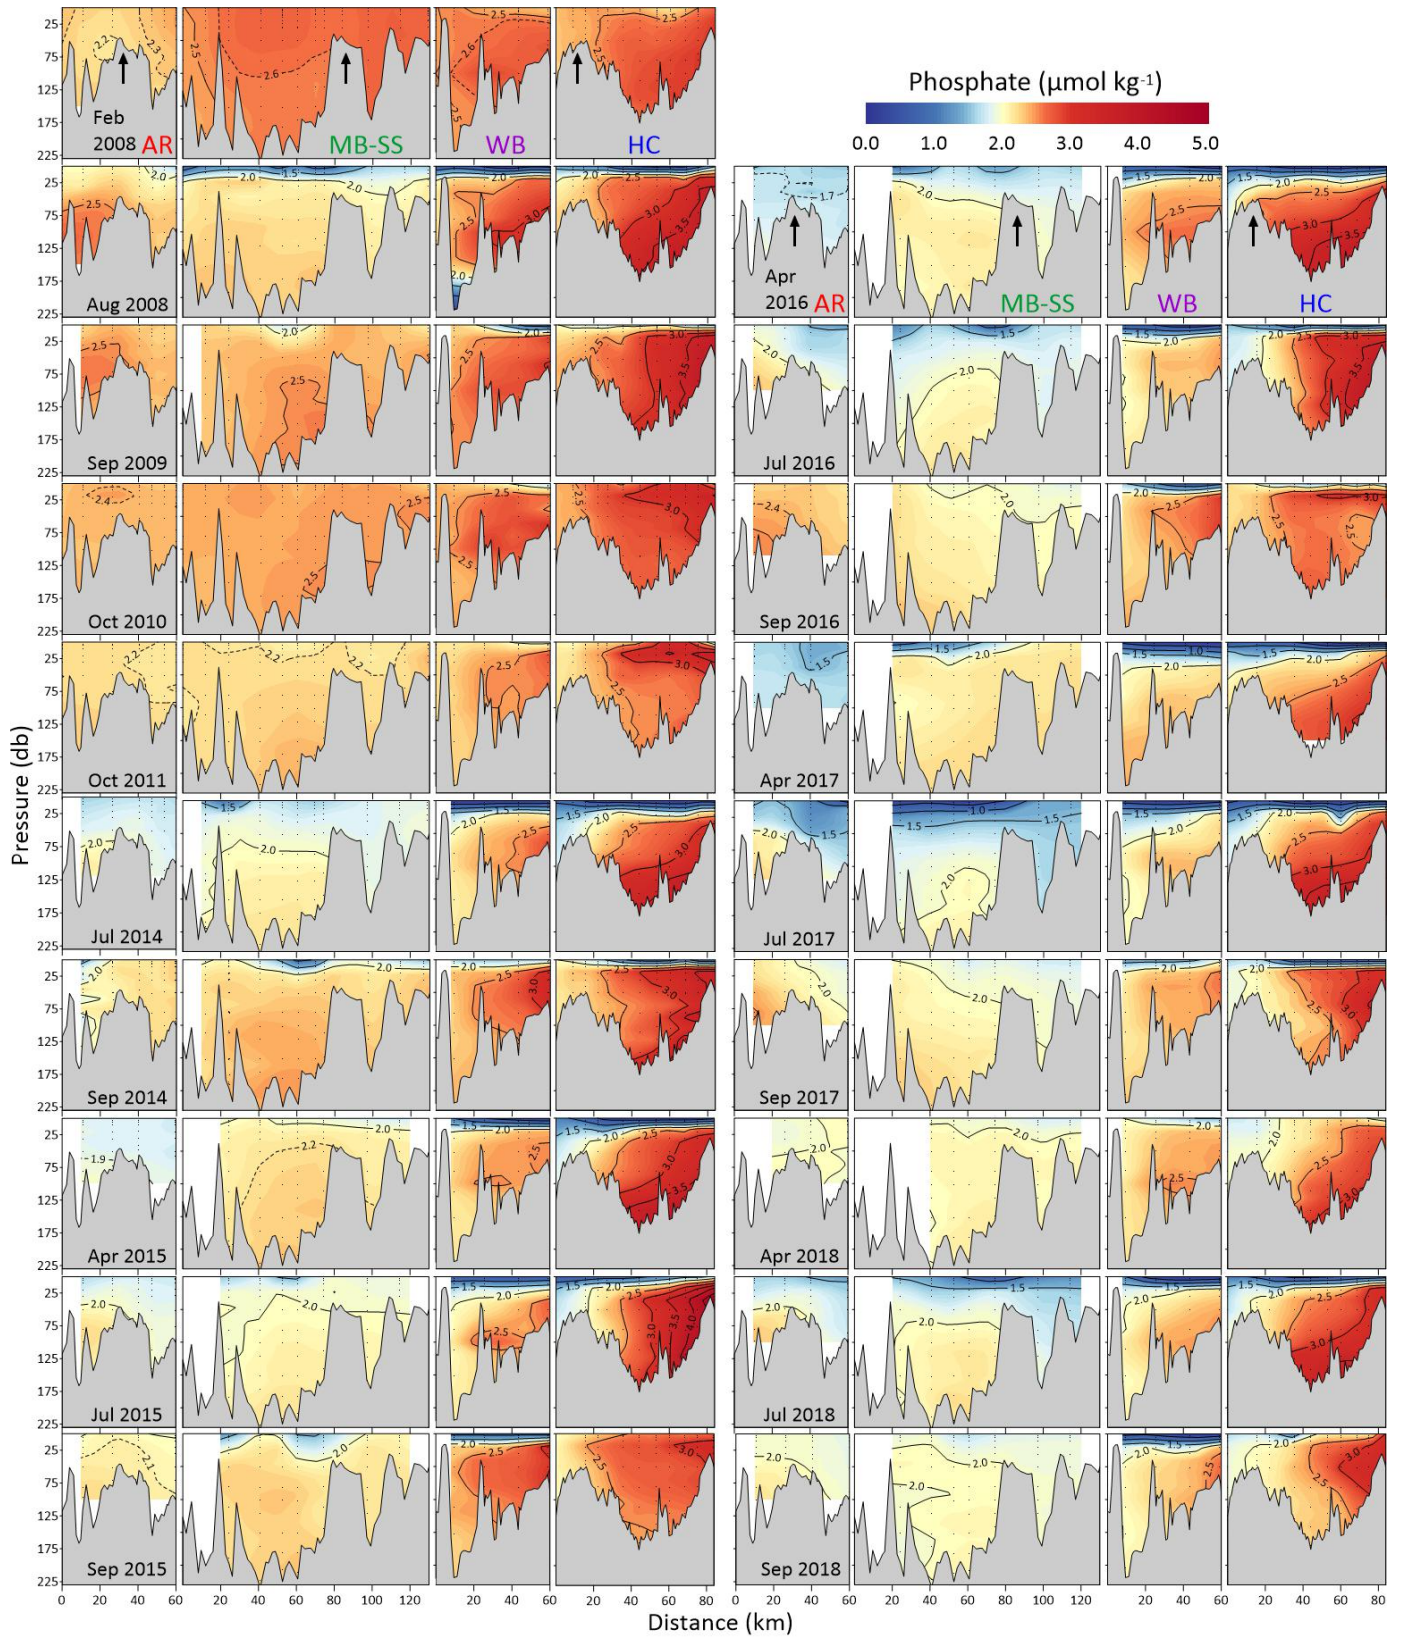

45

**Figure S2:** Depth transect plots from all Puget Sound cruises for phosphate content ( $\mu\text{mol kg}^{-1}$ ). Figure organization is the same as in Figure 5 in the main text.

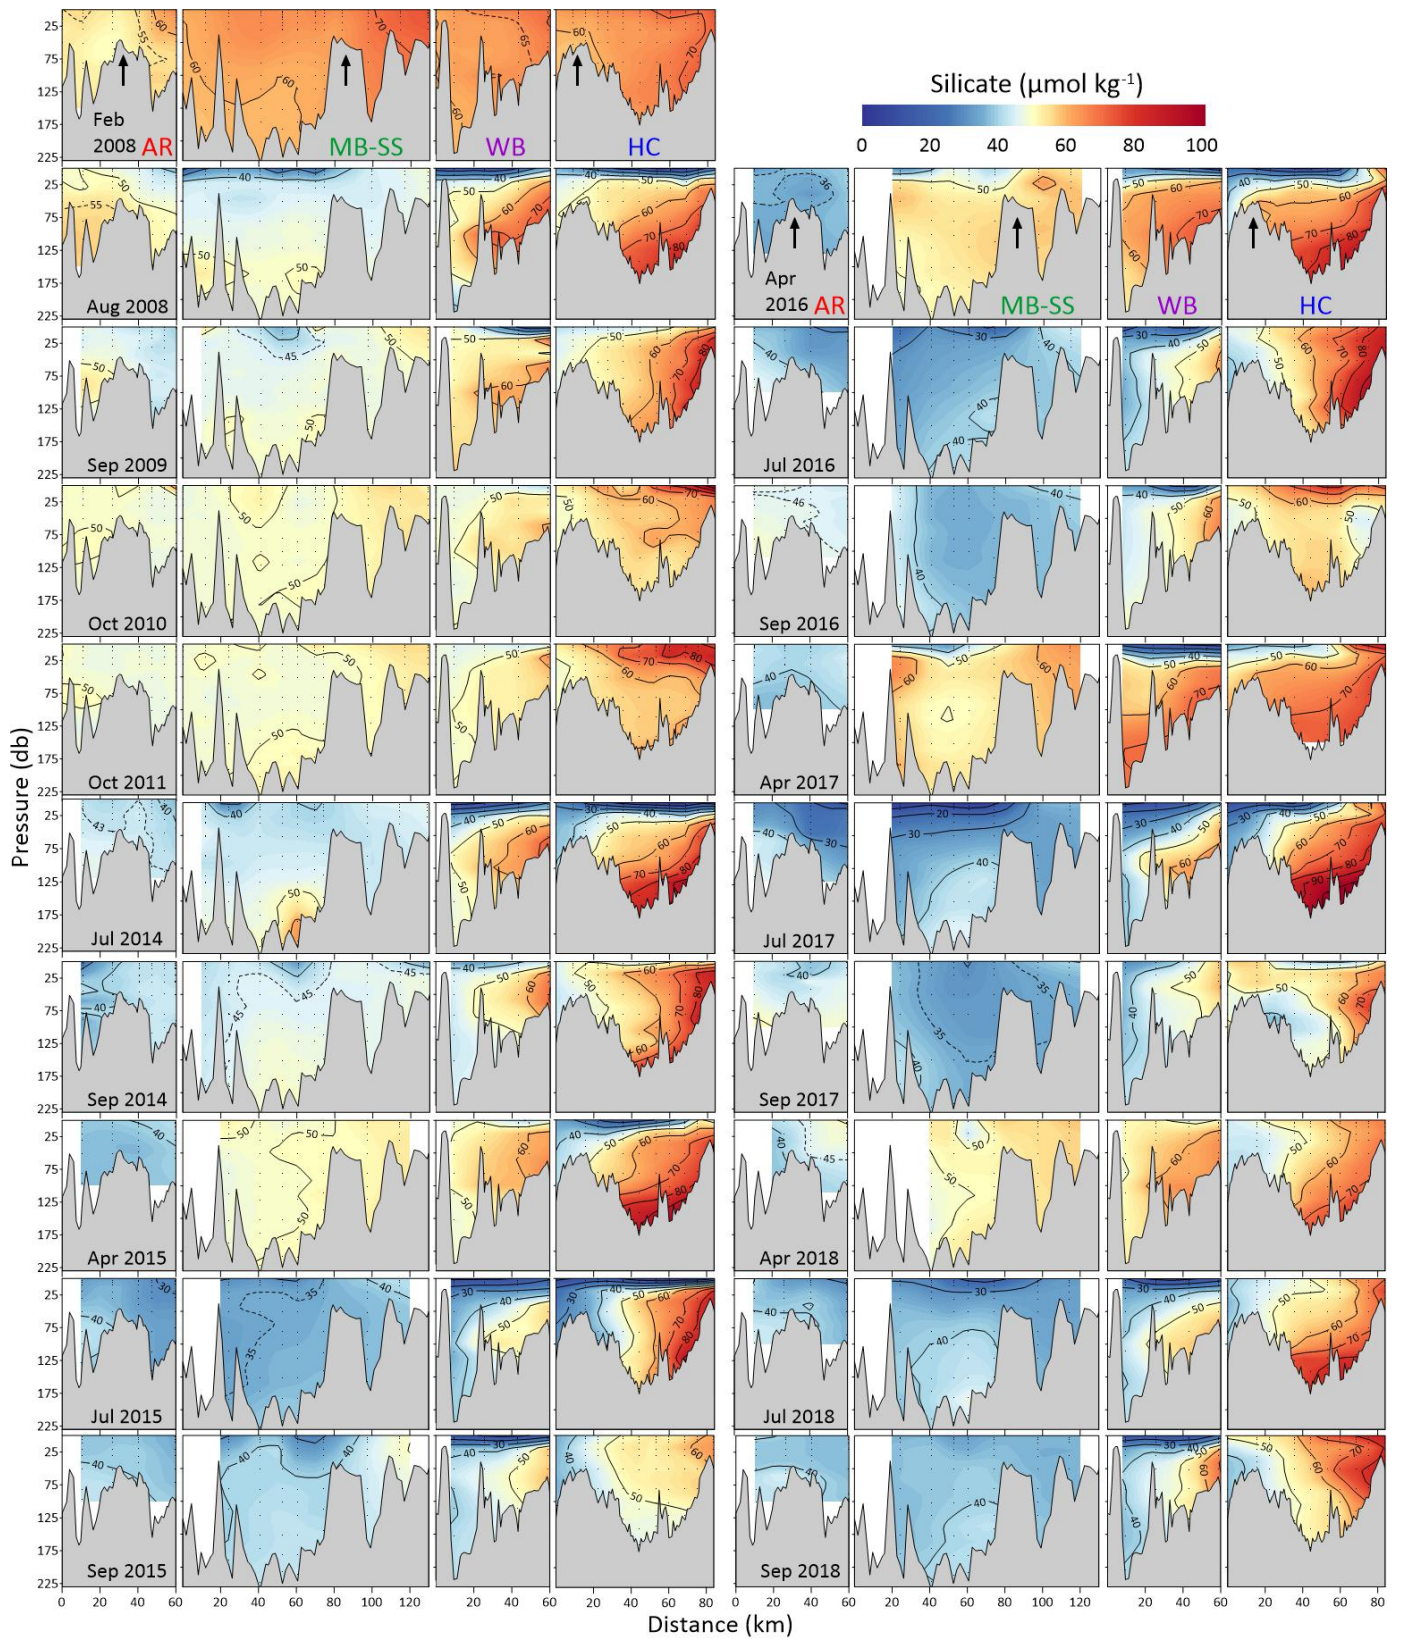

50

**Figure S3:** Depth transect plots from all Puget Sound cruises for silicate content ( $\mu\text{mol kg}^{-1}$ ). Figure organization is the same as in Figure 5 in the main text.

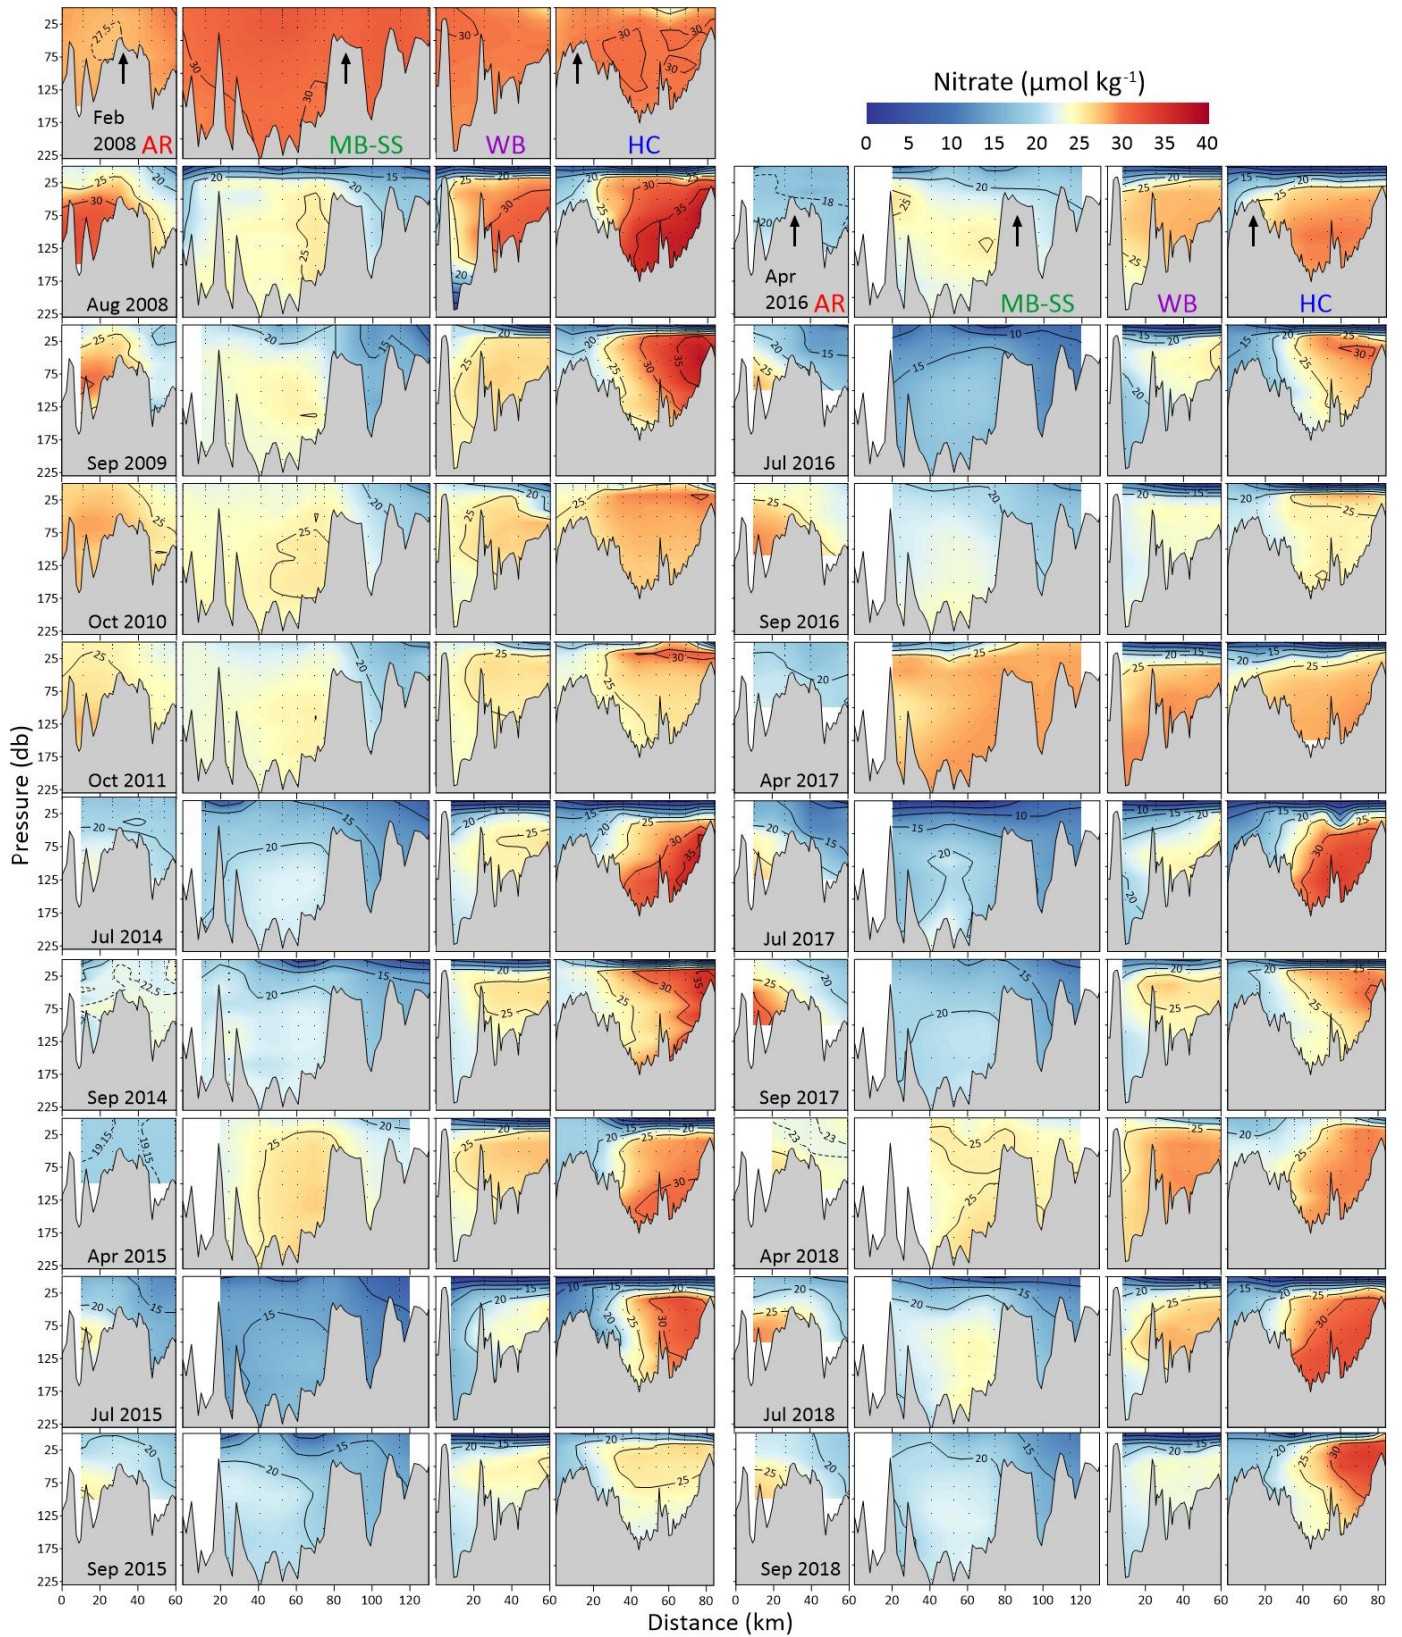

55 **Figure S4:** Depth transect plots from all Puget Sound cruises for nitrate content ( $\mu\text{mol kg}^{-1}$ ). Figure organization is the same as in Figure 5 in the main text.
